# Supplementary material for: Co-delivery of doxorubicin and arsenite with reduction and pH dual-sensitive vesicle for synergistic cancer therapy
Source: Royal Society of Chemistry journal article supplement (doi:10.1039/c5nr07868g), 2015-12-14
Supplement: c5nr07868g1.pdf [file c5nr07868g1.pdf]

## Supplementary Materials

### **Co-delivery of doxorubicin and arsenite with reduction and pH dual-sensitive vesicle for synergistic cancer therapy**

Lu Zhang,<sup>a†</sup> Hong Xiao,<sup>a†</sup> Jingguo Li,<sup>a</sup> Du Cheng,<sup>\*a</sup> Xintao Shuai<sup>\*a,b</sup>

<sup>a</sup> PCFM Lab of Ministry of Education School of Chemistry and Chemical Engineering,  
Sun Yat-sen University, Guangzhou 510275, China

<sup>b</sup> Center of Biomedical Engineering, Zhongshan School of Medicine, Sun Yat-Sen  
University, Guangzhou 510080, China

† These authors contributed equally to this work.

\* Correspondence should be addressed to:

Xintao Shuai

The 135th of Xingang West Road, Guangzhou 510080, China

Tel.: +86-20-84110365

Fax: +86-20-84112245;

E-mail: [shuaixt@mail.sysu.edu.cn](mailto:shuaixt@mail.sysu.edu.cn)

Du Cheng

The 135th of Xingang West Road, Guangzhou 510080, China

Tel.: +86-20-84112105

Fax: +86-20-84112245;

E-mail: [chengdu@mail.sysu.edu.cn](mailto:chengdu@mail.sysu.edu.cn)



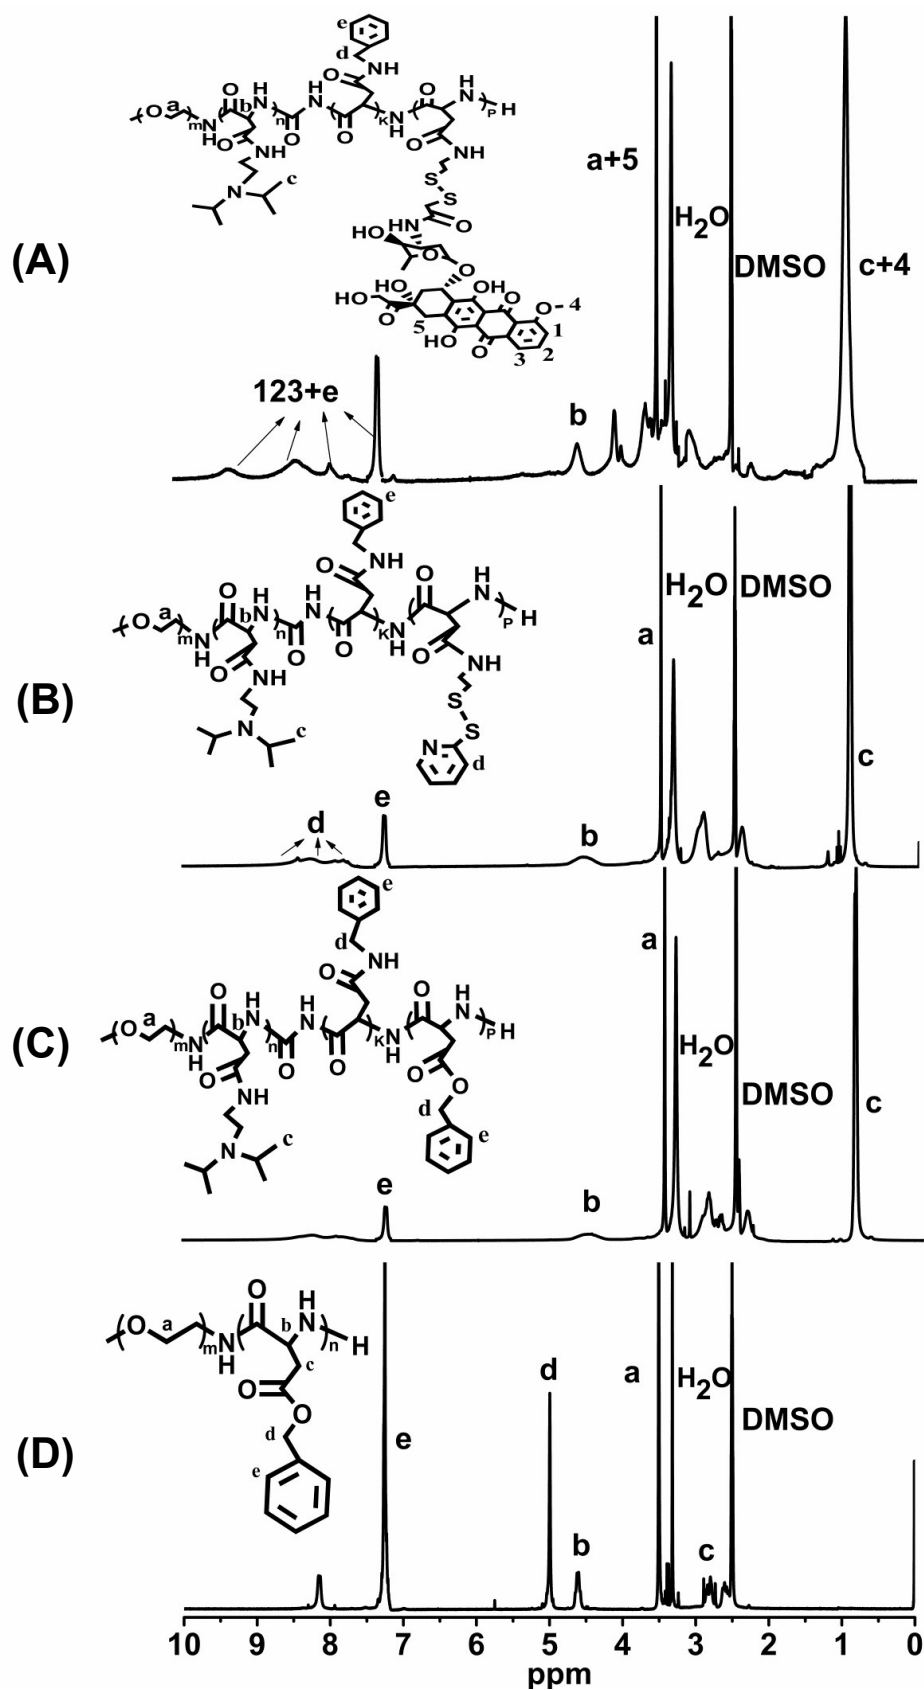

**Fig. S2.**  $^1\text{H}$  NMR spectra of mPEG-PAsp(DIP-co-BZA-co-DOX) (A), mPEG-PAsp(DIP-co-BZA-co-PDTA) (B), mPEG-PAsp(DIP-co-BZA) (C) and mPEG-PBLA

(D) in DMSO- $d_6$ . As shown in Fig. S2C, the DP of the PAsp(DIP) was calculated to be 45 by calculating the peak intensity ratio of the terminal CH<sub>3</sub> group of diisopropyl (DIP) group at 0.95 ppm and the CH<sub>2</sub> group of PEG at 3.62 ppm. After excess MEA reacted with mPEG-PAsp(DIP-*co*-BZA), the all signals of the C<sub>6</sub>H<sub>5</sub> at 7.25 ppm were from the C<sub>6</sub>H<sub>5</sub> group of PAsp(BZA). Compared the peak intensity ratio of the C<sub>6</sub>H<sub>5</sub> at 7.25 ppm with the CH<sub>2</sub> group of PEG at 3.62 ppm, the DP of the PAsp(BZA) was calculated to be 5 (Fig. S2B). In Fig. S2A, the integral values at 0.9-1.1 ppm enlarged compared with that of the terminal CH<sub>3</sub> group of diisopropyl (DIP), so the number of conjugated DOX was 8 by calculating integral ratio.

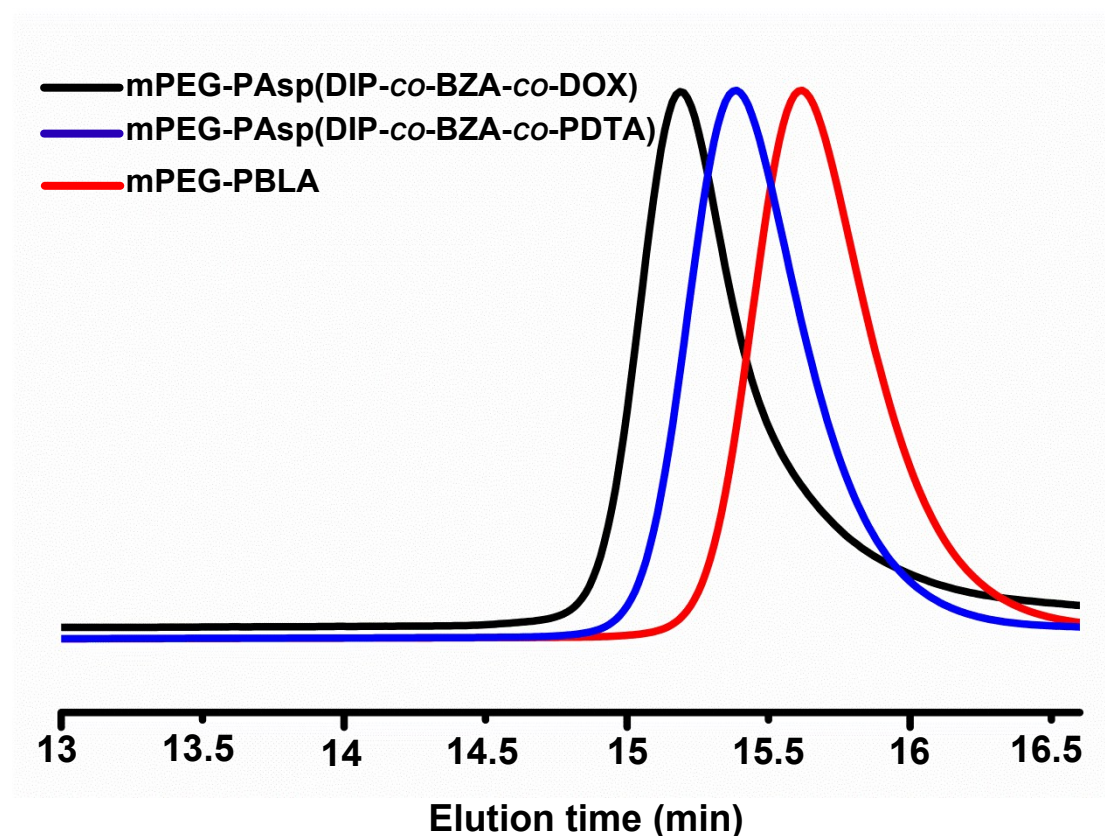

**Fig. S3.** GPC traces of mPEG-PBLA, mPEG-PAsp(DIP-*co*-BZA-*co*-PDPA) and mPEG-PAsp(DIP-*co*-BZA-*co*-DOX) with DMF as an eluent.

**Table S1** Characteristics of the synthesized block copolymers

| Sample name                                     | $M_n^a$ (Da) | $M_n^b$ (Da) | $M_w/M_n^b$ |
|-------------------------------------------------|--------------|--------------|-------------|
| mPEG-PBLA                                       | 14300        | 15110        | 1.04        |
| mPEG-PAsp(DIP- <i>co</i> -BZA- <i>co</i> -PDTA) | 16670        | 17900        | 1.07        |
| mPEG-PAsp(DIP- <i>co</i> -BZA- <i>co</i> -DOX)  | 20180        | 23000        | 1.08        |

<sup>a</sup>) Calculated based on <sup>1</sup>H NMR spectra, <sup>b</sup>) determined by GPC analyses.

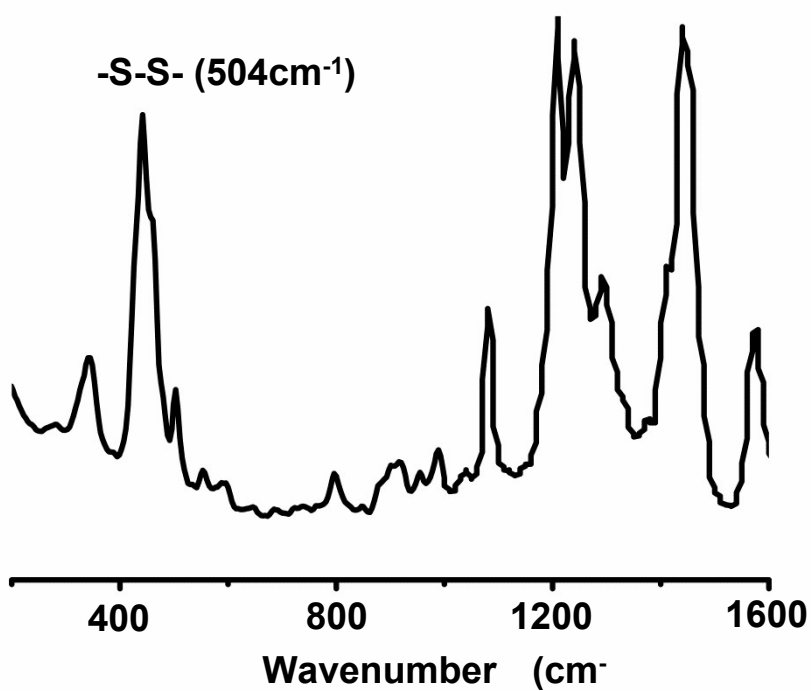**Fig. S4.** Raman spectrum of mPEG-PAsp(DIP-*co*-BZA-*co*-DOX).

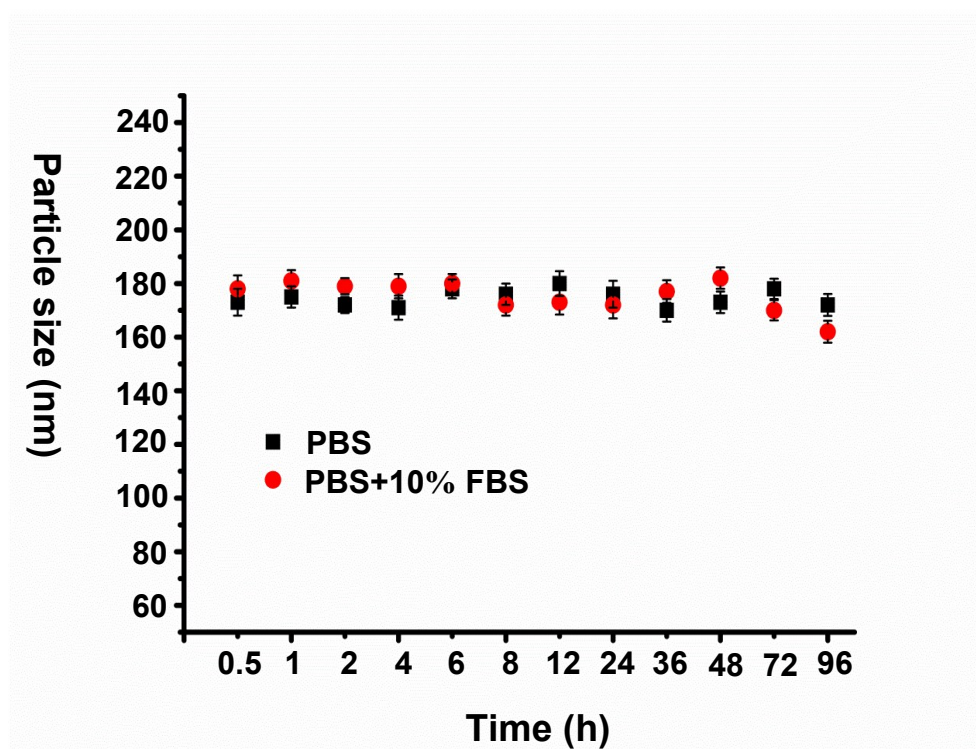

**Fig. S5.** Serum stability of D-As-PDBD vesicle in the PBS solution with/without 10% FBS. Incubation temperature: 37 °C; Data are mean  $\pm$  SD (n = 3).

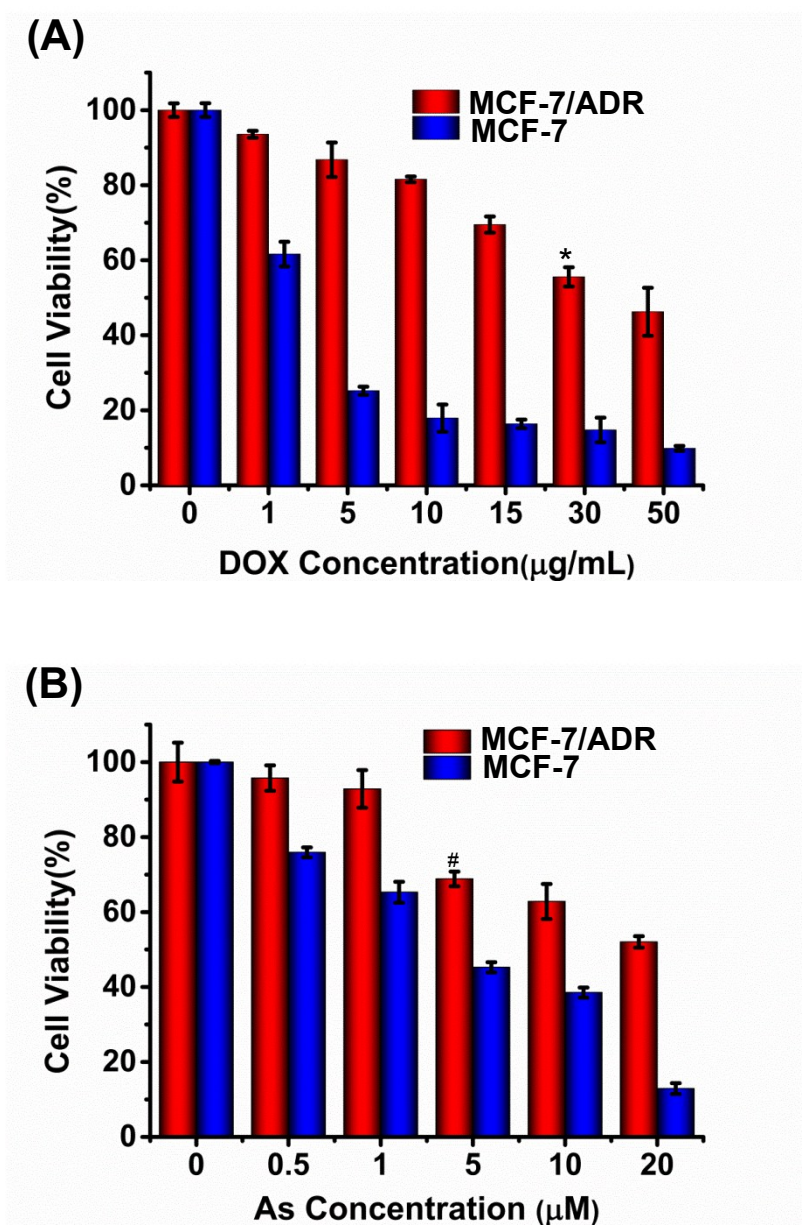

**Fig. S6.** Cytotoxicities of free DOX (A) and free As (B) in the MCF-7/ADR cells and MCF-7 cells. Cell viabilities were detected by MTT assay (mean  $\pm$  SE;  $n=3$ ). \* $P < 0.05$  vs treatment group without DOX; # $P < 0.05$  vs treatment group without As.



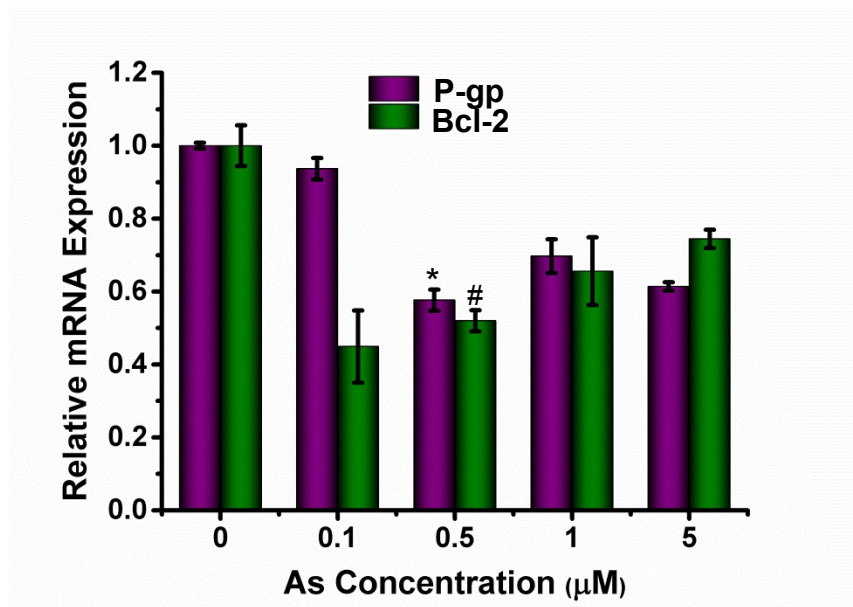

**Fig. S7.** The suppression of P-gp and Bcl-2 gene with different concentrations of free As in MCF-7/ADR cells at mRNA level evaluated by quantitative RT-PCR. (Mean  $\pm$  SE; n =3). \* $P < 0.05$  vs treatment group without As; # $P < 0.05$  vs treatment group without As.



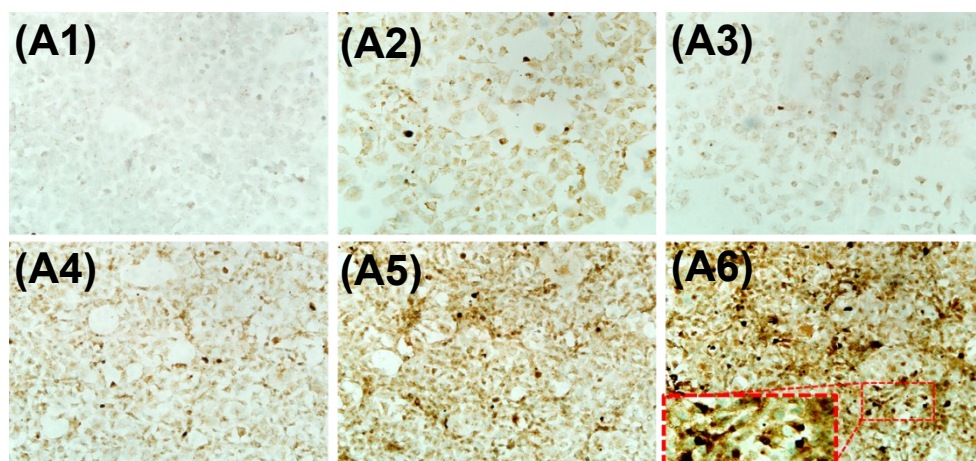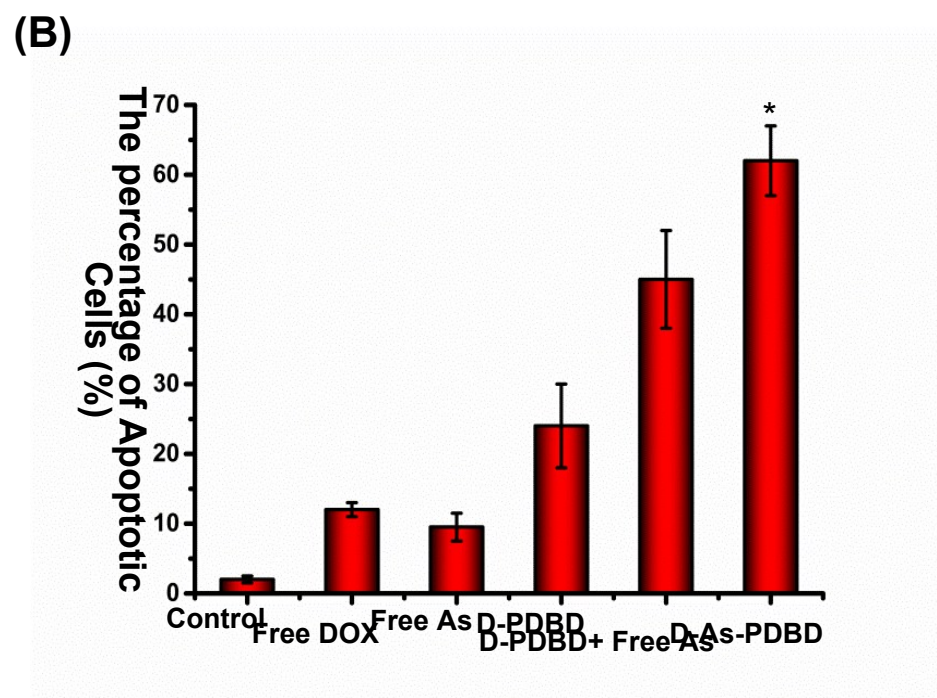

**Fig. S8.** The apoptosis of MCF-7/ADR cells was evaluated by TUNEL assay. MCF-7/ADR cells were incubated with PBS (A1), free DOX (A2), free As (A3), D-PDBD (A4), D-PDBD + free As (A5) and D-As-PDBD (A6), respectively. DOX concentrations if applied: 10  $\mu\text{g/mL}$ ; As concentrations if applied: 0.5  $\mu\text{M}$ ; Scale bars: 50  $\mu\text{m}$ . The nuclei of apoptotic cells were stained brown. The statistical apoptosis rate was shown in (B). \* $P < 0.05$  vs D-PDBP + Free As treatment group.
